# Supplementary material
Source: Research Square preprint supplement (doi:10.21203/rs.3.rs-9535475/v1)
Supplement: Supplementary file 1 [file fc1cd264ee87fd2fce44cb20.docx]

**Table 1**. Demographic structure of study population, CTUS, 2008

| **Variables** | **Men** | **Women** |
| --- | --- | --- |
| Age group  20-29  30-39  40-49  50-60 | 5.5%  36.8%  40.2%  17.5% | 9.5%  41.7%  37.2%  11.6% |
| Education  Primary education  Secondary education  Higher education | 1.9%  51.7%  46.4% | 2.5%  58.2%  39.4% |
| Region  Eastern  Central  Western | 44.4%  35.9%  19.7% | |
| Family size  Two  Three  Four | 71.2%  25%  3.8% | |
| Family structure  Presence of children under age 6  Presence of children ages15-18  Co-residence with parents | 22%  11.1%  5.9% | |
